# Supplementary material for: Effect of Ketogenic Diets on Body Composition and Metabolic Parameters of Cancer Patients: A Systematic Review and Meta-Analysis
Source: MDPI journal article supplement (doi:10.3390/nu14194192), 2022-10-08

## Figure S1 Supplementary analysis of effects on body composition

### (A) Body weight: post-intervention versus baseline

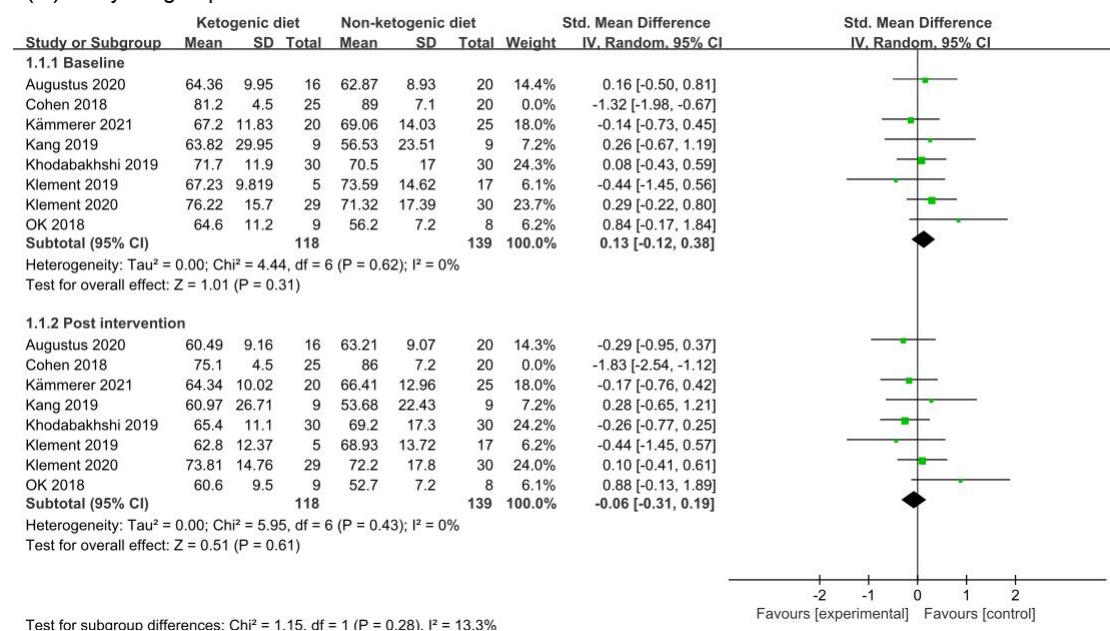

### (B) Body weight: change from baseline

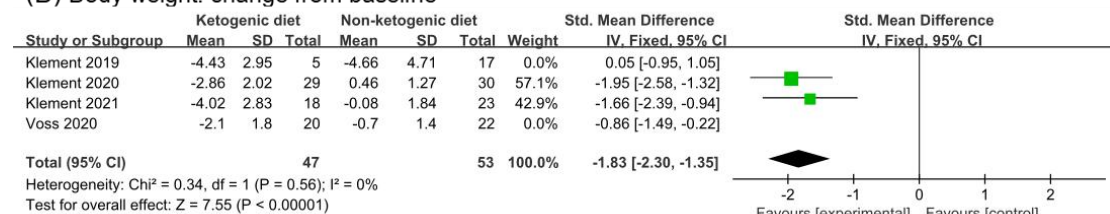

### (C) BMI: post-intervention versus baseline

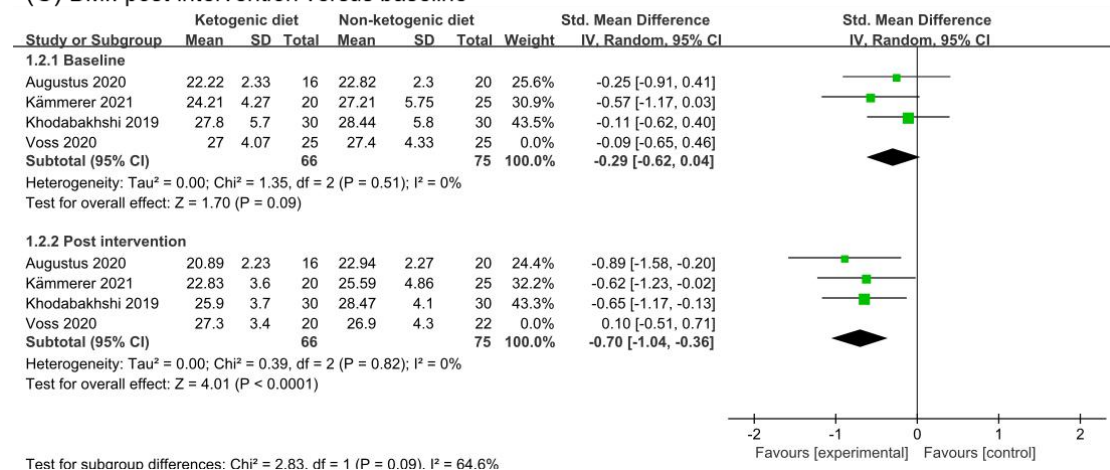

### (D) Fat mass: change from baseline

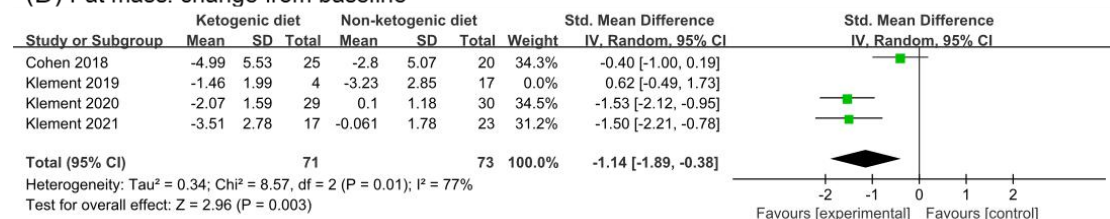

### (E) Fat mass: change from baseline

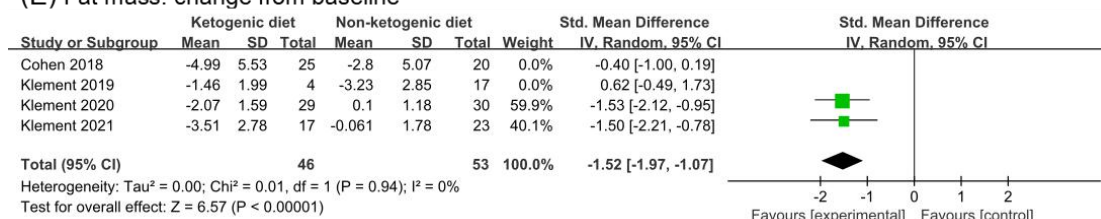

**Figure S2 Supplementary analysis of effects on blood glucose, insulin and IGF-1**

### (A) Blood glucose: post-intervention versus baseline

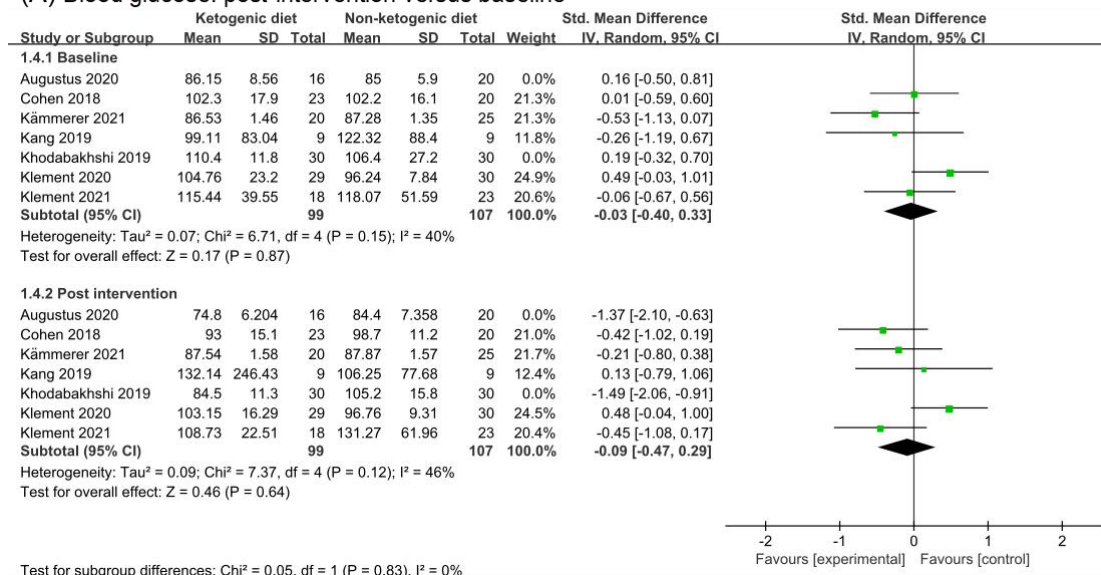

### (B) Insulin: post-intervention versus baseline

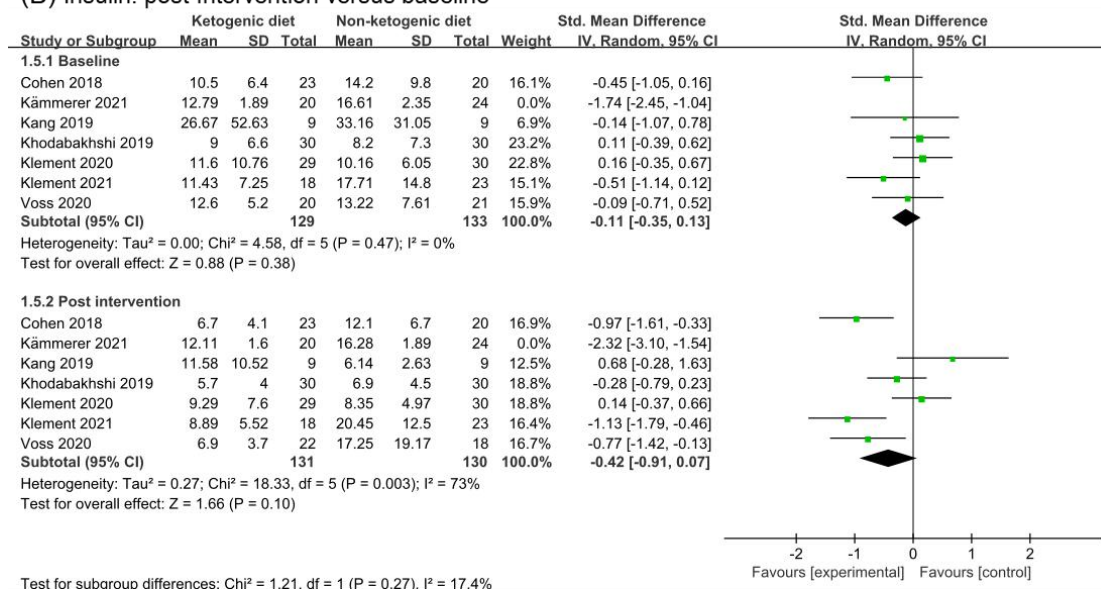

### (C) Insulin: post-intervention versus baseline

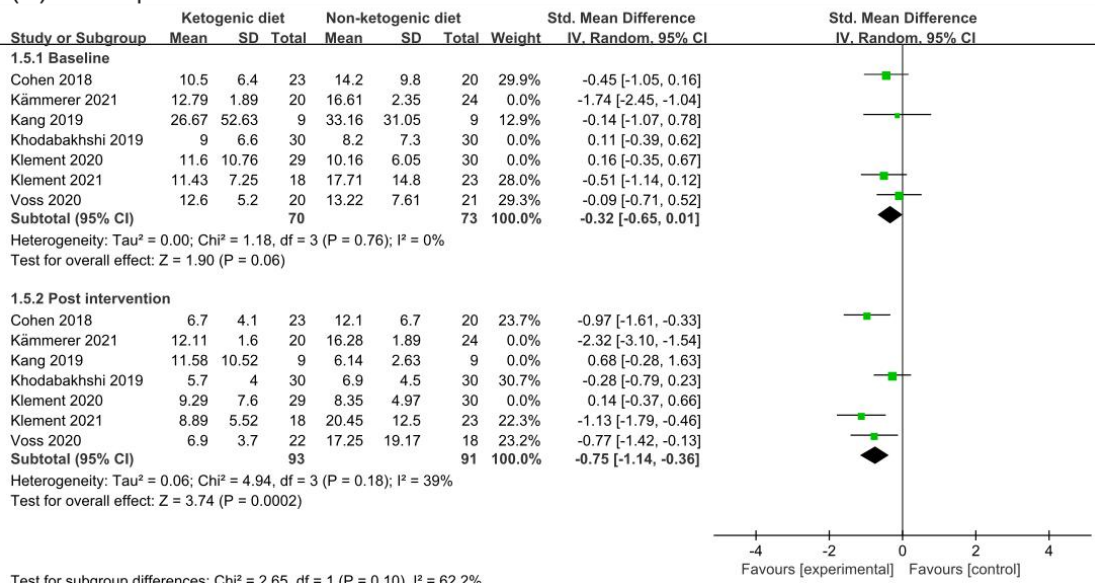

### (D) IGF-1: post-intervention versus baseline

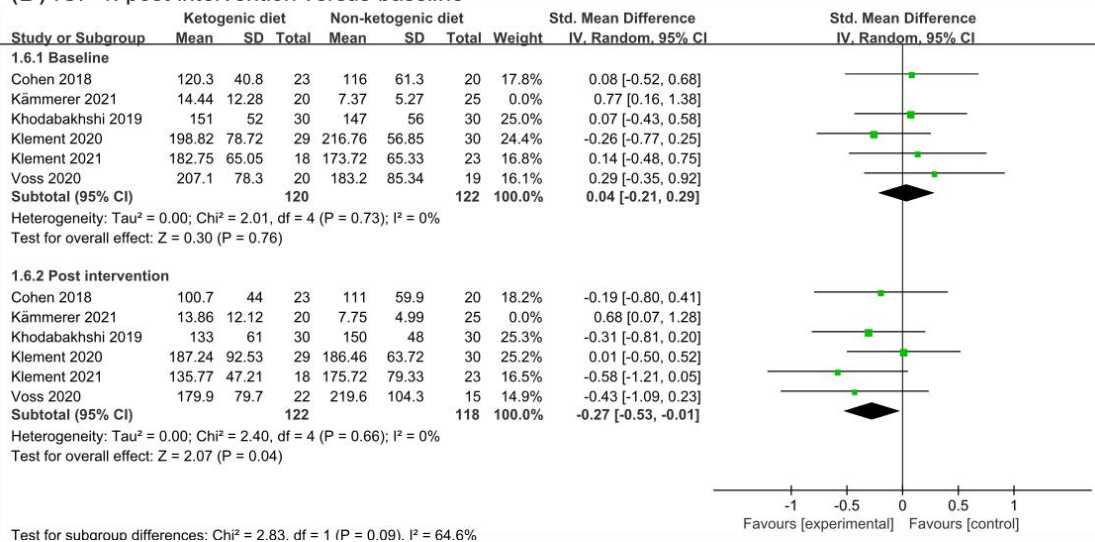

### (E) IGF-1: change from baseline

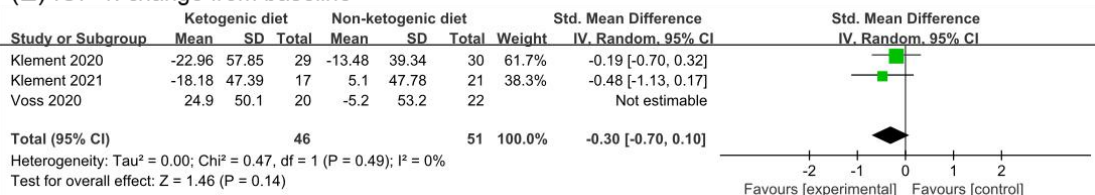

Figure S3 Supplementary analysis of effects on lipid profiles



### (A) Total cholesterol: post-intervention versus baseline

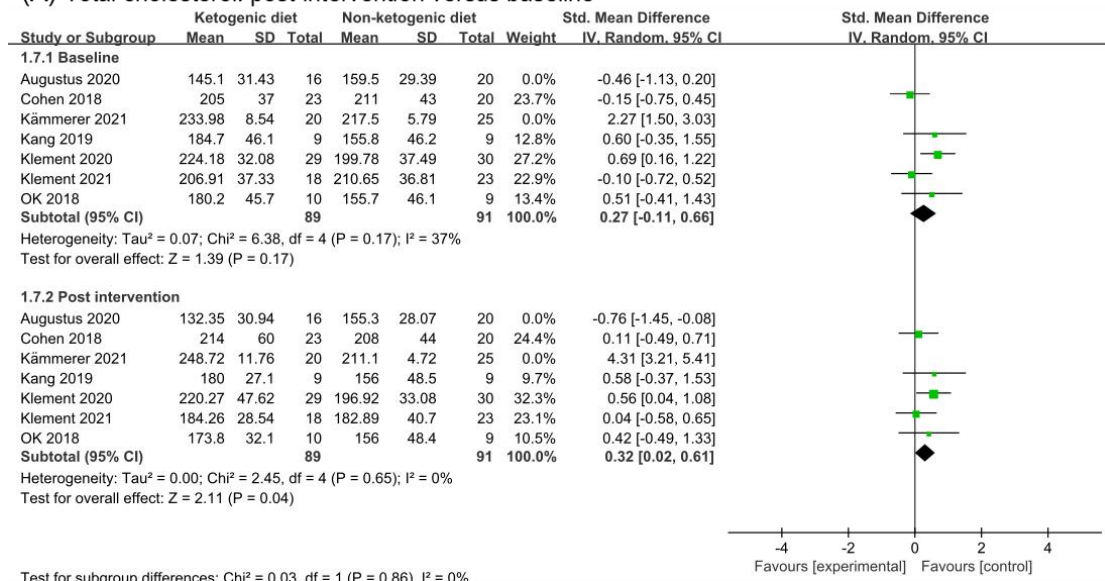

### (B) HDL-C: post-intervention versus baseline

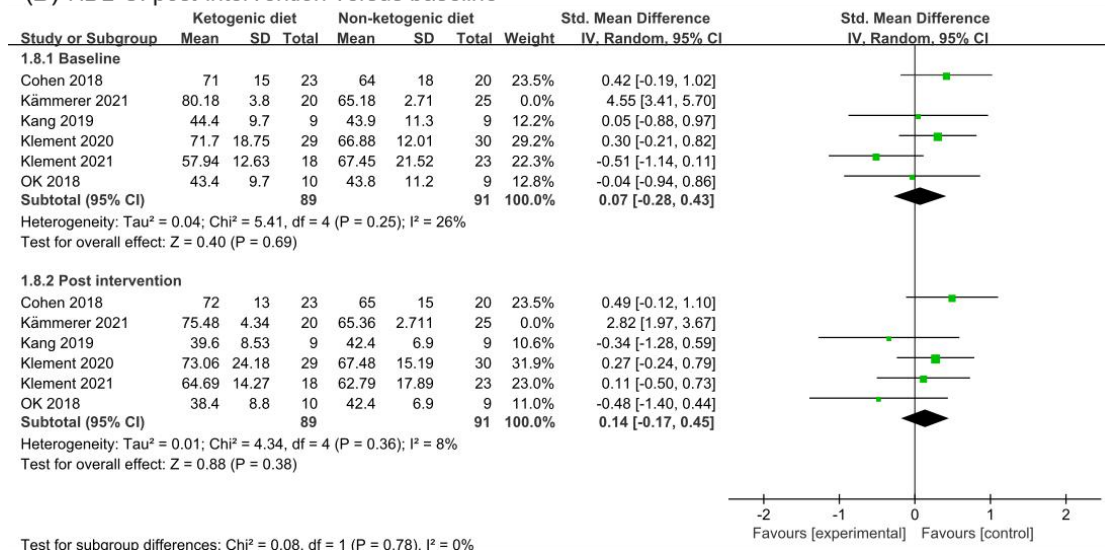

### (C) HDL-C: change from baseline

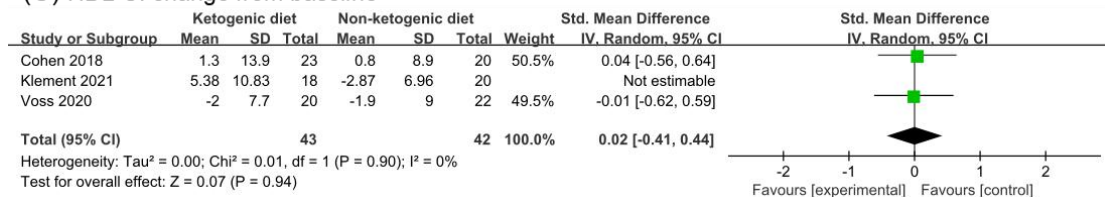

### (D) LDL-C: post-intervention versus baseline

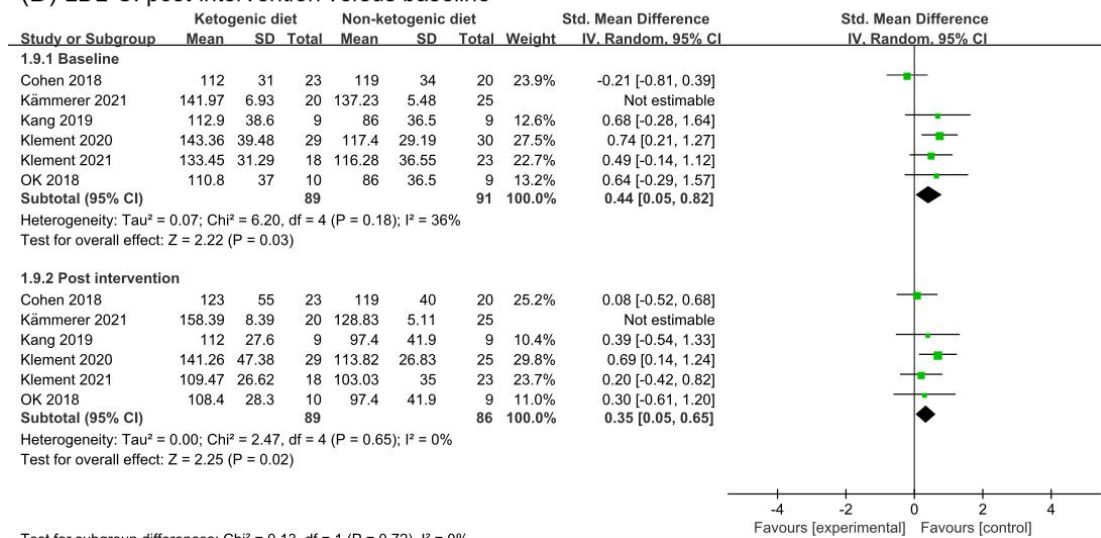

### (E) Triglyceride: post-intervention versus baseline

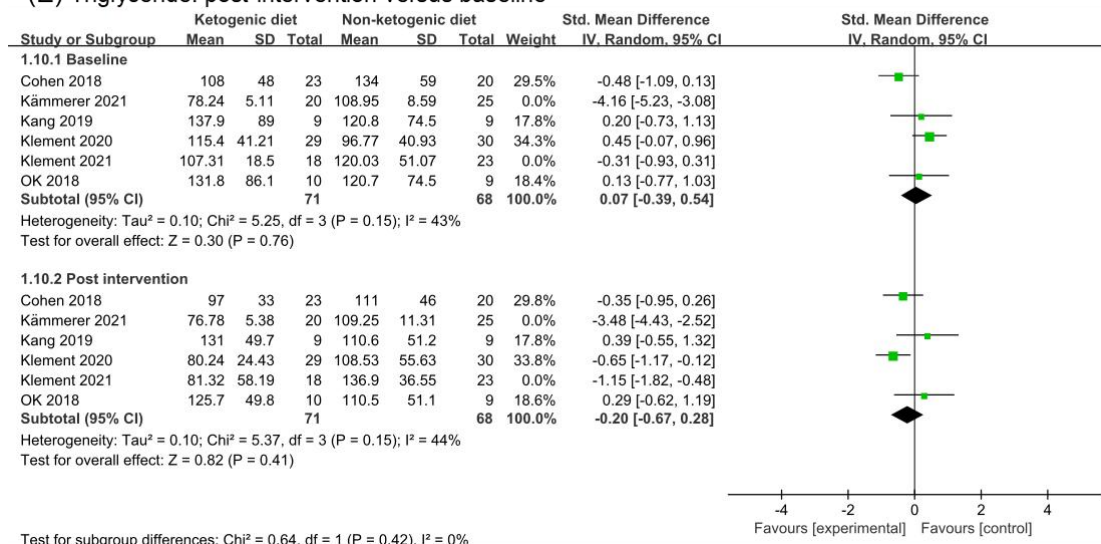

### (F) Triglyceride: change from baseline

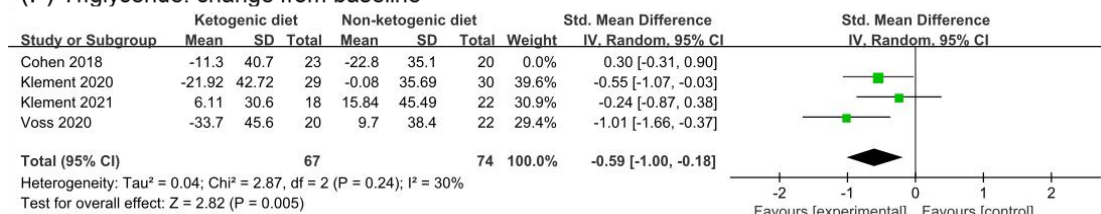

Figure S4 Supplementary analysis of effects on ketosis

### (A) Ketone body: post-intervention versus baseline

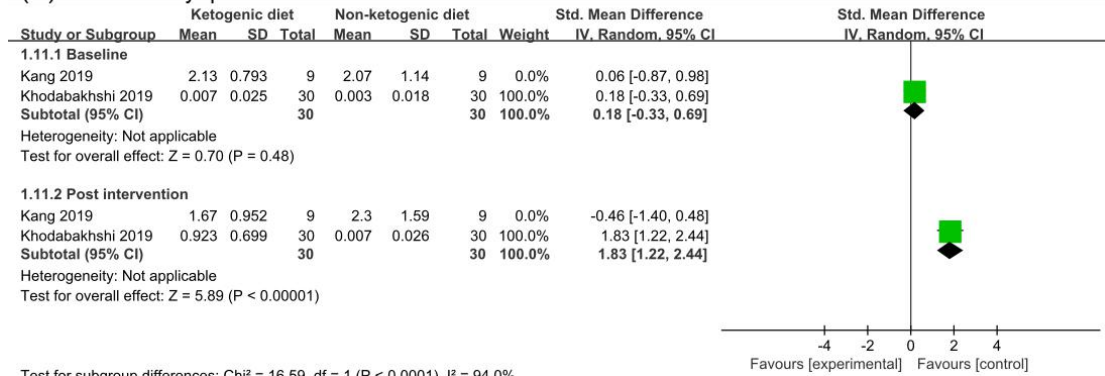

### (B) $\beta$ -hydroxybutyrate: post-intervention versus baseline

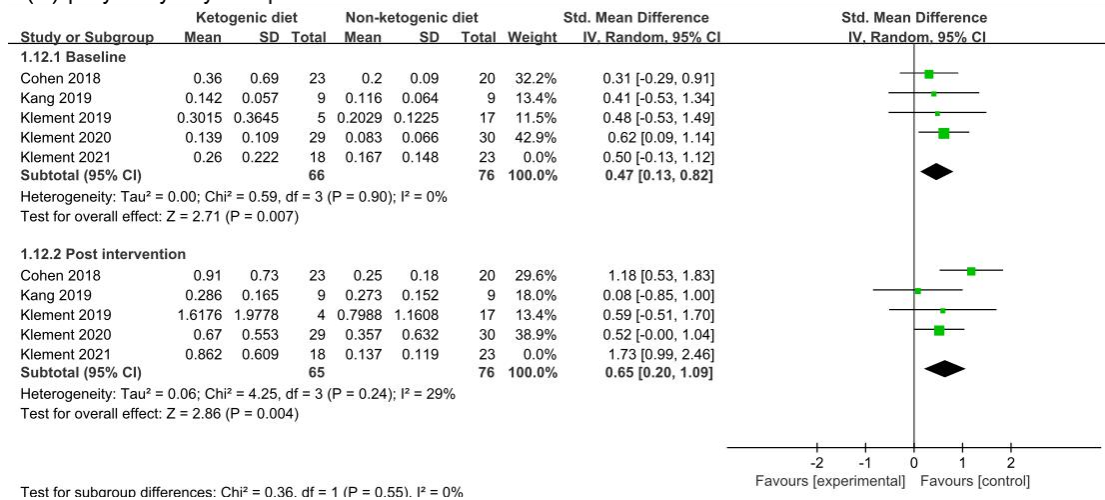

## Figure S5 Supplementary analysis of effects on creatinine

### (A) Creatinine: post-intervention versus baseline

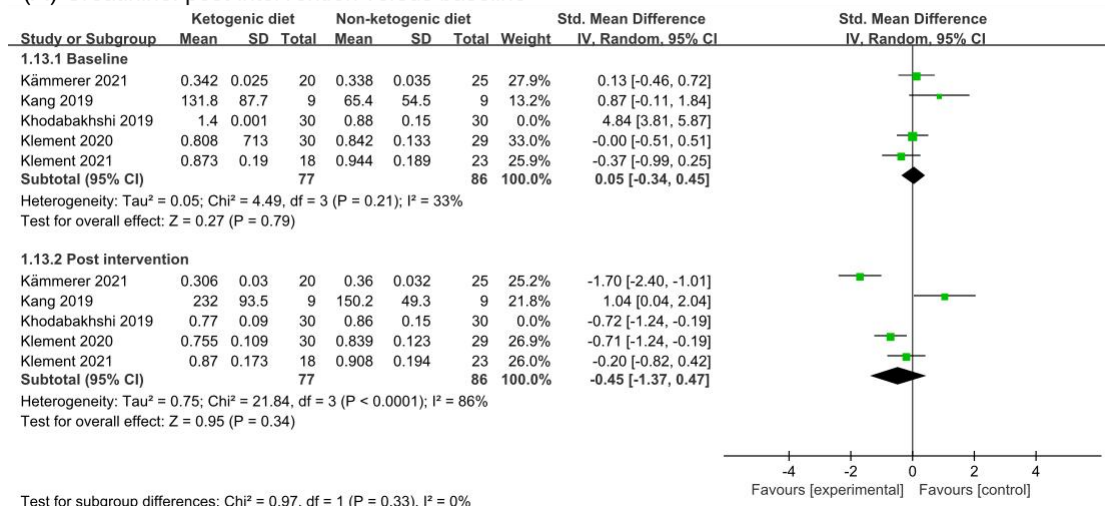

## (B) Creatinine: post-intervention versus baseline

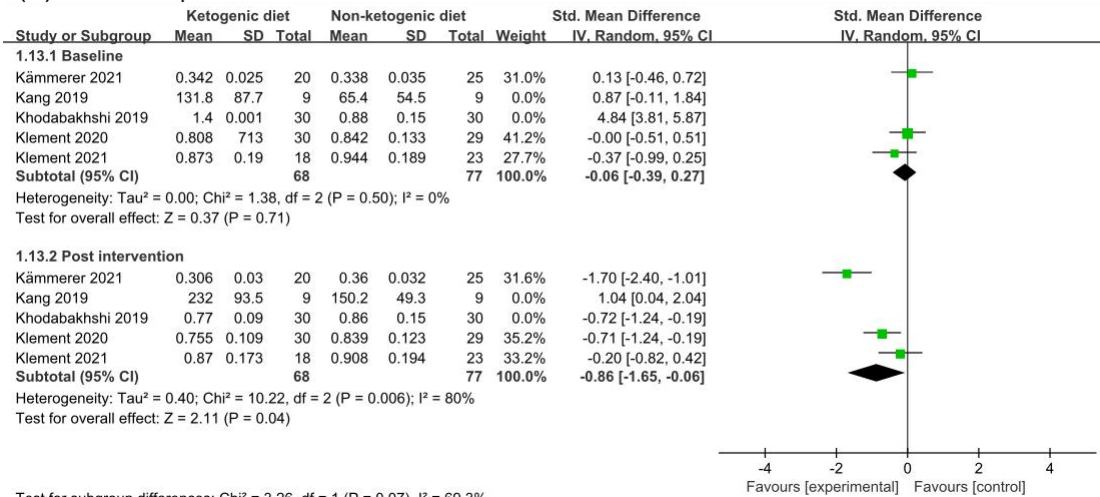

Supplement: s1 [file s1]
