# Supplementary material for: Effect of Ketogenic Diets on Body Composition and Metabolic Parameters of Cancer Patients: A Systematic Review and Meta-Analysis
Source: MDPI journal article supplement (doi:10.3390/nu14194192), 2022-10-08
Supplement: s1 [file s1]

**Table S3 GRADE evidence profile-for the comparison ketogenic diets vs. non-ketogenic diets**

| Quality assessment       |               |                       |                         |                          |                         |                           |                      | No of patients  |         | Effect                                      | Quality             | Importance |
|--------------------------|---------------|-----------------------|-------------------------|--------------------------|-------------------------|---------------------------|----------------------|-----------------|---------|---------------------------------------------|---------------------|------------|
| Item                     | No of studies | Design                | Risk of bias            | Inconsistency            | Indirectness            | Imprecision               | Other considerations | Ketogenic diets | Control | Absolute                                    |                     |            |
| <b>body weight</b>       | 4             | randomised trials     | serious <sup>1</sup>    | no serious inconsistency | no serious indirectness | no serious imprecision    | none                 | 72              | 92      | SMD 1.29 lower (1.64 to 0.93 lower)         | ⊕ ⊕ ⊕ ⊕<br>MODERATE | CRITICAL   |
| <b>BMI</b>               | 1             | observational studies | serious <sup>1</sup>    | no serious inconsistency | no serious indirectness | very serious <sup>2</sup> | none                 | 18              | 23      | SMD 1.3 lower (1.99 to 0.62 lower)          | ⊕ ⊕ ⊕ ⊕<br>VERY LOW | CRITICAL   |
| <b>fat mass</b>          | 4             | randomised trials     | serious <sup>1</sup>    | no serious inconsistency | no serious indirectness | no serious imprecision    | none                 | 75              | 90      | SMD 0.78 lower (1.63 lower to 0.07 higher)  | ⊕ ⊕ ⊕ ⊕<br>MODERATE | CRITICAL   |
| <b>total cholesterol</b> | 2             | randomised trials     | serious <sup>1</sup>    | no serious inconsistency | no serious indirectness | serious <sup>2</sup>      | none                 | 43              | 42      | SMD 0.1 higher (0.33 lower to 0.52 higher)  | ⊕ ⊕ ⊕ ⊕<br>LOW      | CRITICAL   |
| <b>HDL-C</b>             | 3             | randomised trials     | serious <sup>1</sup>    | serious <sup>3</sup>     | no serious indirectness | no serious imprecision    | none                 | 61              | 62      | SMD 0.29 higher (0.26 lower to 0.85 higher) | ⊕ ⊕ ⊕ ⊕<br>LOW      | CRITICAL   |
| <b>LDL-C</b>             | 3             | randomised trials     | serious <sup>1</sup>    | no serious inconsistency | no serious indirectness | no serious imprecision    | none                 | 61              | 64      | SMD 0.03 higher (0.46 lower to 0.52 higher) | ⊕ ⊕ ⊕ ⊕<br>MODERATE | CRITICAL   |
| <b>triglycerides</b>     | 4             | randomised trials     | serious <sup>1</sup>    | serious <sup>3</sup>     | no serious indirectness | no serious imprecision    | none                 | 90              | 94      | SMD 0.37 lower (0.89 lower to 0.15 higher)  | ⊕ ⊕ ⊕ ⊕<br>LOW      | CRITICAL   |
| <b>blood glucose</b>     | 1             | randomised trials     | no serious risk of bias | no serious inconsistency | no serious indirectness | very serious <sup>2</sup> | none                 | 20              | 22      | SMD 0.63 lower (1.25 to 0.01 lower)         | ⊕ ⊕ ⊕ ⊕<br>LOW      | CRITICAL   |
| <b>insulin</b>           | 3             | randomised trials     | serious <sup>1</sup>    | no serious inconsistency | no serious indirectness | no serious imprecision    | none                 | 66              | 71      | SMD 0.15 lower (0.49 lower to 0.19 higher)  | ⊕ ⊕ ⊕ ⊕<br>MODERATE | CRITICAL   |

|                          |   |                       |                      |                          |                         |                        |      |    |    |                                            |                     |           |
|--------------------------|---|-----------------------|----------------------|--------------------------|-------------------------|------------------------|------|----|----|--------------------------------------------|---------------------|-----------|
| <b>IGF-1</b>             | 3 | randomised trials     | serious <sup>1</sup> | no serious inconsistency | no serious indirectness | no serious imprecision | none | 66 | 73 | SMD 0.04 lower (0.38 lower to 0.3 higher)  | ⊕ ⊕ ⊕ ⊖<br>MODERATE | CRITICAL  |
| <b>ketone body</b>       | 2 | randomised trials     | serious <sup>1</sup> | no serious inconsistency | no serious indirectness | serious <sup>2</sup>   | none | 49 | 52 | SMD 1.25 higher (0.27 to 2.23 higher)      | ⊕ ⊕ ⊖ ⊖<br>LOW      | CRITICAL  |
| <b>β-hydroxybutyrate</b> | 1 | observational studies | serious <sup>1</sup> | no serious inconsistency | no serious indirectness | serious <sup>2</sup>   | none | 29 | 30 | SMD 0.79 higher (0.26 to 1.32 higher)      | ⊕ ⊖ ⊖ ⊖<br>VERY LOW | IMPORTANT |
| <b>creatine</b>          | 1 | observational studies | serious <sup>1</sup> | no serious inconsistency | no serious indirectness | serious <sup>2</sup>   | none | 29 | 29 | SMD 0.46 lower (0.98 lower to 0.07 higher) | ⊕ ⊖ ⊖ ⊖<br>VERY LOW | IMPORTANT |
| free T3                  | 2 | observational studies | serious <sup>1</sup> | no serious inconsistency | no serious indirectness | serious <sup>2</sup>   | none | 47 | 52 | SMD 0.75 lower (1.42 to 0.09 lower)        | ⊕ ⊖ ⊖ ⊖<br>VERY LOW | IMPORTANT |

CI: Confidence interval; SMD: Standard Mean difference

<sup>1</sup> There was high risk in selection bias and performance bias. Since the intervention was dietary, the intervention group was informed in all studies. And some participants were assigned to different groups according to their personal desires.

<sup>2</sup> Few participants.

<sup>3</sup> Unexplained heterogeneity.
