# Supplementary material for: Effect of Ketogenic Diets on Body Composition and Metabolic Parameters of Cancer Patients: A Systematic Review and Meta-Analysis
Source: MDPI journal article supplement (doi:10.3390/nu14194192), 2022-10-08
Supplement: s1 [file s1]

| Database                | Terms                                                                                                                                                                                                                                                                                                                                                                                                                                             | Literature number |
|-------------------------|---------------------------------------------------------------------------------------------------------------------------------------------------------------------------------------------------------------------------------------------------------------------------------------------------------------------------------------------------------------------------------------------------------------------------------------------------|-------------------|
| <b>Pubmed</b>           | ((Tumor) OR (Neoplasm)) OR (Tumors)) OR (Neoplasia)) OR (Neoplasias)) OR (Cancer)) OR (Cancers)) OR (Malignant Neoplasm)) OR (Malignancy)) OR (Malignancies)) OR (Malignant Neoplasms)) OR (Neoplasm, Malignant)) OR (Neoplasms)) OR (Neoplasms, Malignant)) OR (Benign Neoplasms)) OR (Benign Neoplasm)) OR (Neoplasms, Benign)) OR (Neoplasm, Benign)) AND (((Diet ketogenic) OR (Diets, Ketogenic)) OR (Ketogenic Diet)) OR (Ketogenic Diets)) | <b>472</b>        |
| <b>Embase</b>           | 'Ketogenic diets' OR 'diet ketogenic' OR 'keto diet' OR 'ketogenous diet' OR 'ketotic diet' cancer; cancers; 'malignant neoplasia'; 'malignant neoplastic disease'; 'malignant tumor' 'malignant tumour' 'neoplasia, malignant' 'tumor, malignant' 'tumour, malignant' 'randomized controlled trial'                                                                                                                                              | <b>25</b>         |
| <b>Cochrane library</b> | <b>Neoplasms:</b> Neoplasm, Malignant; Malignancies; Cancer; Malignancy; Malignant Neoplasms; Malignant Neoplasm; Cancers; Neoplasms, Malignant; Neoplasias; Tumors; Tumor; Neoplasia; Neoplasm; Benign Neoplasms; Neoplasms, Benign; Benign Neoplasm; Neoplasm, Benign<br><br><b>Diet, Ketogenic:</b> Ketogenic Diet; Ketogenic Diets; Diets, Ketogenic                                                                                          | <b>64</b>         |

| Author, year | Design | Participants number | Age of control | Age of intervention | Control diet                                                                                                                              | Intervention                                                                                                                                                       | Intervention duration | Cancer type                                                                                                                    | Treatment                                                        | Outcome                                                                                                                                                                                 |
|--------------|--------|---------------------|----------------|---------------------|-------------------------------------------------------------------------------------------------------------------------------------------|--------------------------------------------------------------------------------------------------------------------------------------------------------------------|-----------------------|--------------------------------------------------------------------------------------------------------------------------------|------------------------------------------------------------------|-----------------------------------------------------------------------------------------------------------------------------------------------------------------------------------------|
| Cohen 2018   | RCT    | 73                  | 58.6±11.7      | 61.5±8.5            | American Cancer Society diet: promoting fiber-rich fruits, vegetables, whole grains, and lean meats with small amounts of healthful fats. | Ketogenic diet, approximately 5% of energy from carbohydrate ( $\leq 20$ g/day), 25% from protein ( $\leq 100$ g/day) and 70% from fat ( $\geq 125$ g/day).        | 12 weeks              | Ovarian cancer, endometrial cancer                                                                                             | Chemotherapy                                                     | Short Form-12 Health Survey, dietary adherence, body composition, metabolic effects, serum lipids, serum ketone levels, adverse events                                                  |
| OK 2018      | RCT    | 30                  | 66.3±9.8       | 57.8±7.3            | General Diet: carbohydrate: protein: fat ratio of 55-65: 7-20: 15-30                                                                      | Ketogenic diet: 3-6% of daily energy as carbohydrates; 1g/kg of high-quality protein; 70-80% of energy through fats; Fat: Carbohydrate+Protein, (w:w)=1.05-1.75:1. | 10 days               | Ampulla of vater cancer, common bile duct cancer, cholangiocarcinoma, duodenal cancer, pancreatic cancer, Neuroendocrine Tumor | Pancreatectomy                                                   | Subject characteristics, patient-generated subjective global assessment, biochemical indices, meal satisfaction score and meal intake-related problems, body composition, urine ketones |
| Kang 2019    | RCT    | 30                  | 66.3 ± 9.8     | 58.3 ± 7.6          | General diet: 55–65%, 7–20%, and 15–30% of energy from carbohydrate, protein, and fat.                                                    | Low-carbohydrate ketogenic diet: 4%, 16%, and 80% of energy from carbohydrate, protein, and fat.                                                                   | 4 weeks               | Pancreatic ca, ampulla of vater cancer, common bile duct, duodenal cancer, neuroendocrine tumour                               | Pyloruspreserving pancreaticoduodenectomy, distal pancreatectomy | Blood biochemistry, ketone bodies, insulin, glucose, and TNF- $\alpha$ in blood, differential metabolites                                                                               |

|                   |         |    |            |            |                                                                                                                                                            |                                                                                                                                                                                                      |            |                                                                                        |                                     |                                                                                                                                            |
|-------------------|---------|----|------------|------------|------------------------------------------------------------------------------------------------------------------------------------------------------------|------------------------------------------------------------------------------------------------------------------------------------------------------------------------------------------------------|------------|----------------------------------------------------------------------------------------|-------------------------------------|--------------------------------------------------------------------------------------------------------------------------------------------|
| Khodabakhshi 2019 | RCT     | 77 | 45.2±15    | 44.8±8.4   | Standard diet: 55% CHO, 15% protein, and 30% fat.                                                                                                          | A medium chain triglycerides (MCT)-based KD (contained 6% calorie from CHO, 19% protein, 20% MCT, 55% fat)                                                                                           | 3 months   | Breast cancer                                                                          | Deprivation therapy                 | Safety and tolerability of diet, quacity of life, dietary intake and adherence, survival rate, body composition and biochemical parameters |
| Klement 2019      | Non-RCT | 22 | 64.4±2.6   | 63.2±6.1   | Standard diet                                                                                                                                              | Ketogenic diet with essential amino acids supplement.                                                                                                                                                | 5-6 weeks  | Head and neck cancer                                                                   | Chemotherapy                        | Change of body composition                                                                                                                 |
| Augustus 2020     | RCT     | 40 | 51.8 ± 4.2 | 49.8 ± 6.7 | Standard traditional diet                                                                                                                                  | Modified ketogenic diet contained approximately 10% CHO, 15% proteins, and 75% fats.                                                                                                                 | 16 weeks   | Breast cancer, prostate cancer, colon/rectal cancer, cervical cancer, and lung cancer. | Chemotherapy or radiation treatment | Quality of life, biochemical measures, body composition.                                                                                   |
| Klement 2020      | Non-RCT | 63 | 51.5±10.5  | 52.4±12.1  | Standard diet: whole grains, vegetables, and fruits and limiting fats to 30–35% daily energy intake, with an emphasis on reducing fats from animal origin. | Ketogenic diet with essential amino acids supplement, suggesting replacing carbohydrates with fat, consuming 75–80% calories from fat, and limiting carbohydrates to 50 g per day and 10 g per meal. | 18–47 days | Breast cancer                                                                          | Radiotherapy                        | Dietary adherence, body composition, safety and quality of life, blood parameters.                                                         |

|               |         |    |           |           |                                                       |                                                                                                                                                                                               |            |                   |                                 |                                                                                    |
|---------------|---------|----|-----------|-----------|-------------------------------------------------------|-----------------------------------------------------------------------------------------------------------------------------------------------------------------------------------------------|------------|-------------------|---------------------------------|------------------------------------------------------------------------------------|
| Voss 2020     | RCT     | 50 | 56.0±12.5 | 55.7±8.1  | Standard diet without calorie restriction             | Two calorically restricted ketogenic diet 3-day intervals flanking 3 days of fasting. Calorie restriction was defined as 21-23 kcal per kg body weight, Carbohydrates were limited to 50 g/d. | 9 days     | Glioma            | Radiation therapy               | Body weight and quality of life, metabolic parameters, PFS/OS, adverse effects.    |
| Kämmerer 2021 | Non-RCT | 61 | 51.9±5.6  | 52.5±6.4  | Standard diet: CHO 52-62%, Protein 16-17%, Fat 28-31% | KD: CHO 2-4%, Protein 16-18%, Fat 80-85%                                                                                                                                                      | 20 weeks   | Breast cancer     | Multimodal interventions        | Physical performance, body composition, quality of life, blood parameters.         |
| Klement 2021  | Non-RCT | 49 | 63.5±8.6  | 56.5±10.7 | Standard diet                                         | Ketogenic diet (≤50 g of carbohydrates per day) with essential amino acids supplement.                                                                                                        | 30-55 days | Colorectal cancer | Radiation therapy, chemotherapy | Body composition, pathological tumor responses, blood parameters, quatity of life. |

| Author, year      | Inclusion criteria                                                                                                                                                                                                                | Exclusion criteria                                                                                                                                                                                                                                                                                                                                                        |
|-------------------|-----------------------------------------------------------------------------------------------------------------------------------------------------------------------------------------------------------------------------------|---------------------------------------------------------------------------------------------------------------------------------------------------------------------------------------------------------------------------------------------------------------------------------------------------------------------------------------------------------------------------|
| Cohen 2018        | Women with ovarian or endometrial cancer, BMI $\geq$ 18.5 kg/m <sup>2</sup> , age $\geq$ 19 years, no medical condition affecting body weight (other than cancer and associated treatment), and not attempting diet modification. | Not mentioned                                                                                                                                                                                                                                                                                                                                                             |
| OK 2018           | Adults diagnosed with ancreatobiliary cancer and hospitalized to undergo pancreaticoduodenectomy or distal pancreatectomy.                                                                                                        | Pregnant, severe diabetes patients with diabetic complications, hyperlipidemia patients with cardiovascular complications, patients with renal impairment below 90% of normal glomerular filtration rate, and illiterate patients                                                                                                                                         |
| Kang 2019         | Adult patients ( $\geq$ 19 years old) with pancreatobiliary cancer who underwent pancreaticoduodenectomy or distal pancreatectomy.                                                                                                | Pregnancy, illiterate, foreigners, severe diabetic complications, hyperlipidaemia with cardiovascular complications, or renal insufficiency with a normal glomerular filtration rate $<$ 90%.                                                                                                                                                                             |
| Khodabakhshi 2019 | Breast cancer patients with locally advanced or metastatic disease, between 18 and 70 years old, and undergoing chemotherapy for at least 3 months.                                                                               | Patients with significant cardiac, renal or neurologic comorbidities, or an active state of malnutrition, diabetes, pregnancy, and Karnofsky index less than 70.                                                                                                                                                                                                          |
| Klement 2019      | Head and neck cancer patients. Age between 18 and 75 years. 18 kg/m <sup>2</sup> $<$ BMI $<$ 34 kg/m <sup>2</sup> . Karnofsky index $\geq$ 70.                                                                                    | Palliative patients, in particular known metastases; type I diabetes; pregnancy; pacemaker and other metallic parts that influence BIA measurements. Known defects in enzymes necessary for ketogenesis, ketolysis, fatty acid oxidation or gluconeogenesis. Unable to speak or understand German. Cognitive impairments or psychological disorders. Renal insufficiency. |
| Augustus 2020     | Diagnosed with cancer $>$ 1 year, currently receiving chemotherapy or radiation treatment, being $>$ 18 years of age, currently a nonvegetarian and currently consuming a carbohydrate-based diet ( $>$ 40%)                      | Subjects currently on a ketogenic treatment plan, disease, or medical conditions which may affect usual dietary behavior (diabetes, renal disease, stomach ulcers, and hypertension) and preexisting psychosocial conditions such as moderate/severe depression/anxiety.                                                                                                  |

|              |                                                                                                                                                                                                                                                                                                                                                                                                                                       |                                                                                                                                                                                                                                                                                                                                                                                                                                                                                                                                                                                                                                         |
|--------------|---------------------------------------------------------------------------------------------------------------------------------------------------------------------------------------------------------------------------------------------------------------------------------------------------------------------------------------------------------------------------------------------------------------------------------------|-----------------------------------------------------------------------------------------------------------------------------------------------------------------------------------------------------------------------------------------------------------------------------------------------------------------------------------------------------------------------------------------------------------------------------------------------------------------------------------------------------------------------------------------------------------------------------------------------------------------------------------------|
| Klement 2020 | Women between 18 and 75 years of age with non-metastatic breast cancer.                                                                                                                                                                                                                                                                                                                                                               | Karnofsky index < 70, body mass index (BMI) < 18 kg/m <sup>2</sup> , metallic implants, pregnancy, cognitive impairment, inability to speak or understand German, and metabolic defects posing a contraindication against consuming a KD.                                                                                                                                                                                                                                                                                                                                                                                               |
| Voss,2020    | Recurrence of a histologically confirmed glioblastoma, gliosarcoma or malignant progression, of a lower grade glioma on MRI. Age above 18 years and Karnofsky performance score (KPS) ≥60%. Prior radiation therapy of the tumor at least 6 months before inclusion, prior therapy with temozolomide, multidisciplinary tumor board recommendation for re-irradiation. Adequate hematologic, hepatic, renal and coagulatory function. | Bowel obstruction. Malnutrition, cachexia, insulin-dependent diabetes or other medical conditions that might increase the risk of the dietary intervention or could impair the ability to adhere to the diet.                                                                                                                                                                                                                                                                                                                                                                                                                           |
| Kämmerer2021 | Women aged between 26–69 years (mean age 51.7 years) were enrolled in the study during standard rehabilitation at one specific center after the treatment of primary or recurrent BC.                                                                                                                                                                                                                                                 | Karnofsky index < 70 and/or expected life span 12 months, additional malignant tumors at the time of recruitment, participation in other trials, unintentional weight loss and body mass index (BMI) < 18, dementia or other clinically relevant alterations of mental status that could impair the ability to cope with the diet, insufficient knowledge of the German language and therefore inability to follow instructions, type 1 diabetes mellitus, decompensated heart failure, myocardial infarction within the last 6 months, symptomatic atrial fibrillation, severe acute infection, pregnancy or pancreatic insufficiency. |
| Klement 2021 | Age between 18 and 75 years, diagnosis of a non-metastatic colorectal cancer, Karnofsky index ≥70 and body mass index (BMI) between 18 and 34 kg/m <sup>2</sup> .                                                                                                                                                                                                                                                                     | Metallic implants, pregnancy, cognitive impairment, inability to speak or understand German and metabolic disorders that would pose a counter-indication for a KD.                                                                                                                                                                                                                                                                                                                                                                                                                                                                      |
