# Supplementary material for: Effect of Ketogenic Diets on Body Composition and Metabolic Parameters of Cancer Patients: A Systematic Review and Meta-Analysis
Source: Nutrients. 2022 Oct 8;14(19):4192. doi: 10.3390/nu14194192 (PMC9570668; doi:10.3390/nu14194192)
Supplement: Supplementary file 1 [file nutrients-14-04192-s001.zip]

Archive with 4 entries (4 files):
- Suplementary Table S2 Characteristics of included studies.pdf
- Supplementary Figures S1-5.pdf
- Supplementaty Table S3 GRADE evidence profile.pdf
- Suplementary Table S1 Database Terms and Literature number.pdf
